# Supplementary material for: Intriguing electronic insensitivity and high carrier mobility in monolayer hexagonal YN
Source: Royal Society of Chemistry journal article supplement (doi:10.1039/c8tc00558c), 2018-01-01
Supplement: c8tc00558c1.pdf [file c8tc00558c1.pdf]

# Intriguing Electronic Insensitivity and High Carrier Mobility in Monolayer Hexagonal YN

Kai Zheng,<sup>a,#</sup> Xibin Yang,<sup>b,#</sup> Heping Cui,<sup>a,#</sup> Qun Yang,<sup>a</sup> Huaiyu Ye,<sup>a</sup> Daxi Xiong,<sup>b</sup>  
Sven Ingebrandt,<sup>c</sup> Xianping Chen,<sup>\*a</sup>

<sup>a)</sup> Key Laboratory of Optoelectronic Technology & Systems, Education Ministry of China, Chongqing University and College of Optoelectronic Engineering, Chongqing University, Chongqing 400044, China

<sup>b)</sup> Suzhou institute of Biomedical Engineering, Chinese Academy of Sciences, Suzhou 215163, China

<sup>c)</sup> Department of Informatics and Microsystem Technology, University of Applied Sciences, Kaiserslautern Zweibruecken 66482, Germany

#These authors contributed equally to this work.

Correspondence authors: Xianping Chen (xianpingchen@cqu.edu.cn)

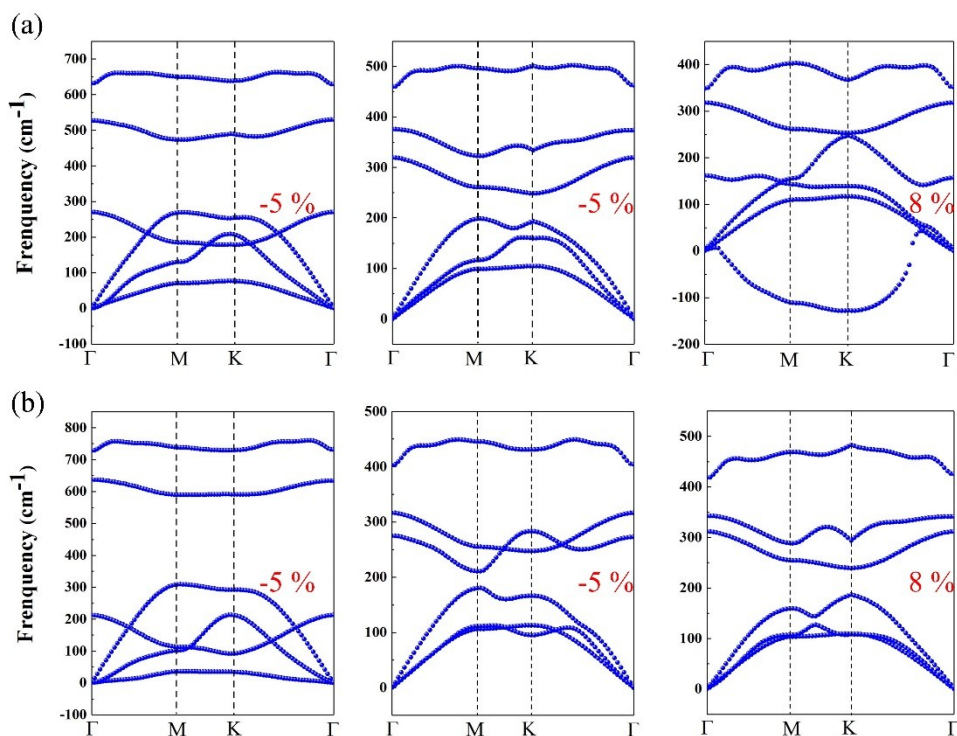

**Fig S1** Phonon spectrums of monolayer *h*-YN under (a) biaxial and (b) uniaxial strain.

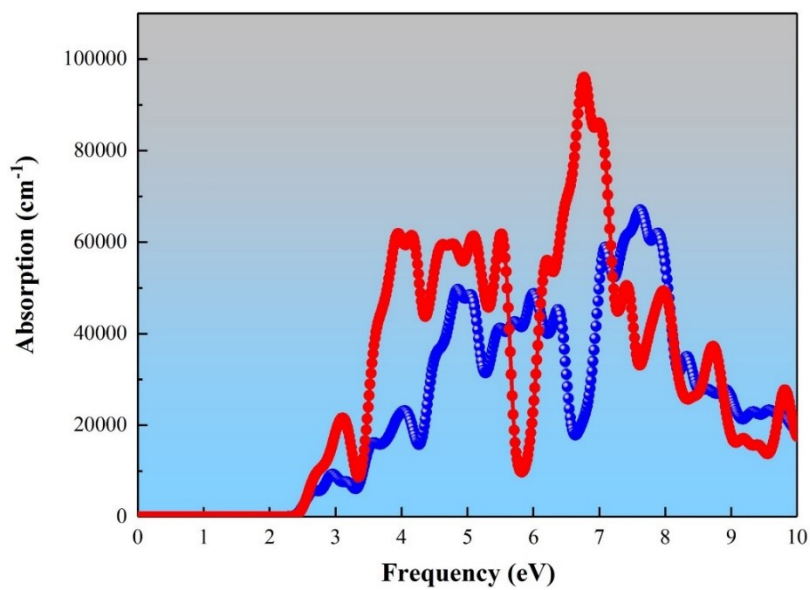

**Fig S2** Calculated absorption spectra for monolayer *h*-YN from the parallel (in blue) and perpendicular (in red) directions at the HSE06 level.

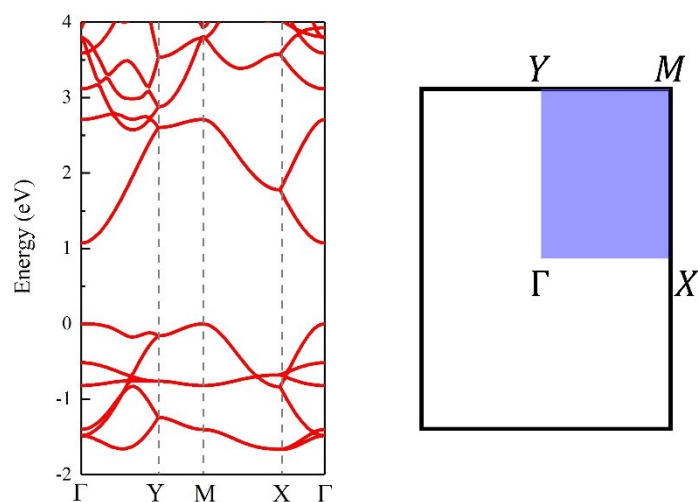

**Fig S3** Electronic band structure and corresponding Brillouin zone path of *h*-YN in an orthorhombic lattice.  $\Gamma$  (0, 0, 0), Y (0, 0.5, 0), S (0.5, 0.5, 0), X (0.5, 0, 0) are the high symmetric points in Brillouin zone.

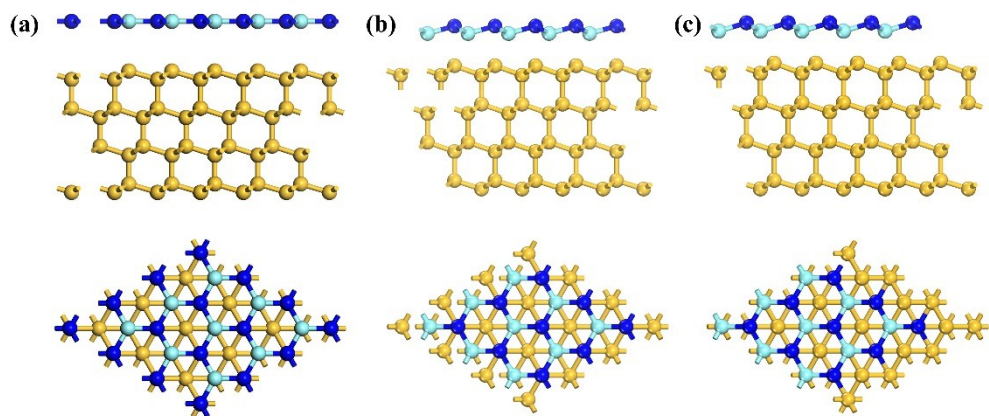

**Fig S4** Top and side views of atomic structures of *h*-YN on Si (111) surfaces with I, II, III stacking patterns.
